# Supplementary material for: Induktive Logikprogrammierung - Grundlagen und Techniken.
Source: MDPI journal article supplement (doi:10.3390/medicina58060818), 1996-01-01
Supplement: s1 [file s1]

# Supplementary Materials:

**Table S1.** TNM-based AJCC staging system for ocular adnexal lymphoma, eighth edition

| Category                          | TNM Criteria                                                                                                                                                                           |
|-----------------------------------|----------------------------------------------------------------------------------------------------------------------------------------------------------------------------------------|
| <u>Primary tumor (T)</u>          |                                                                                                                                                                                        |
| T0                                | No evidence of lymphoma                                                                                                                                                                |
| T1                                | Lymphoma involving the conjunctiva alone without eyelid or orbital involvement                                                                                                         |
| T2                                | Lymphoma with orbital involvement with or without conjunctival involvement                                                                                                             |
| T3                                | Lymphoma with preseptal eyelid involvement with or without orbital involvement                                                                                                         |
| T4                                | Orbital adnexal lymphoma and extraorbital lymphoma extending beyond the orbit to adjacent<br>_____ structure, such as bone, maxillofacial sinuses, and brain                           |
| <u>Lymph node involvement (N)</u> |                                                                                                                                                                                        |
| N0                                | No evidence of lymph node involvement                                                                                                                                                  |
| N1                                | Involvement of lymph node region or regions draining the ocular adnexal structures and<br>_____ superior to the mediastinum (preauricular, parotid, submandibular, and cervical nodes) |
| N1a                               | Involvement of a single lymph node region superior to the mediastinum                                                                                                                  |
| N1b                               | Involvement of two or more lymph node regions, superior to the mediastinum                                                                                                             |
| N2                                | Involvement of lymph node regions of mediastinum                                                                                                                                       |
| N3                                | Diffuse or disseminated involvement of peripheral and central lymph node regions                                                                                                       |
| <u>Distant metastasis (M)</u>     |                                                                                                                                                                                        |
| M0                                | No evidence of involvement of other extranodal sites                                                                                                                                   |
| M1a                               | Noncontiguous involvement of tissues or organ external to the ocular adnexa (e.g., parotid<br>_____ glands, submandibular gland, lung, liver, spleen, kidney, breast)                  |
| M1b                               | Lymphomatous involvement of the bone marrow                                                                                                                                            |
| M1c                               | Both M1a and M1b involvement                                                                                                                                                           |

**Table S2.** Antibodies used for immunohistochemistry

| Antibody  | Company                         | Dilution rate |
|-----------|---------------------------------|---------------|
| CD20      | DAKO, Santa Clara, CA, US       | 1:500         |
| CD3       | DAKO, Santa Clara, CA, US       | 1:250         |
| Bcl-2     | DAKO, Santa Clara, CA, US       | 1:300         |
| CD10      | LEICA, Buffalo Grove, IL, US    | 1:50          |
| Cyclin D1 | LEICA, Buffalo Grove, IL, US    | 1:50          |
| Ki-67     | DAKO, Santa Clara, CA, US       | 1:300         |
| IgG       | Cell Marque, Darmstadt, Germany | 1:300         |
| IgG4      | Cell Marque, Darmstadt, Germany | 1:1200        |

**Table S3.** Univariable analysis of prognostic factors

| Variable                                | <u>Response, n (%)</u> |               | p-value |
|-----------------------------------------|------------------------|---------------|---------|
|                                         | CR (n=33)              | Non-CR (n=15) |         |
| LDH >225 U/L                            | 13 (39.4%)             | 10 (76.9%)    | 0.022*  |
| Ki-67 ≥ 5%                              | 25 (75.8%)             | 9 (60.0%)     | 0.266   |
| Treatment (RT or CT with immunotherapy) | 26 (78.8%)             | 7 (46.7%)     | 0.026*  |
| SUV <sub>max</sub>                      | 2.52 (1.30)            | 2.64 (1.78)   | 0.822   |

\*p < 0.05, Chi-square test and Mann-Whitney test are used. Values are presented with n (%) or mean (standard variation).
